# Supplementary material for: A Novel Bayesian Framework Infers Driver Activation States and Reveals Pathway-Oriented Molecular Subtypes in Head and Neck Cancer
Source: Cancers (Basel). 2022 Oct 3;14(19):4825. doi: 10.3390/cancers14194825 (PMC9563147; doi:10.3390/cancers14194825)
Supplement: Supplementary file 1 [file cancers-14-04825-s001.zip › Supplementary Table S1_Reactomeenrichedpathways.csv]

ID	Description	GeneRatio	BgRatio	pvalue	p.adjust	qvalue	geneID	Count
R-HSA-1474290	Collagen formation	26/471	90/10867	4.06E-15	3.36E-12	3.07E-12	COL22A1/LOXL2/MMP13/LOXL3/COL18A1/COL10A1/COL11A1/COL5A1/COL6A1/COL3A1/COL1A1/COL1A2/MMP9/P4HA1/PLOD2/P3H2/COLGALT1/PLOD3/PLOD1/P3H1/SERPINH1/MMP3/LAMA3/LAMC2/COL16A1/COL7A1	26
R-HSA-69190	DNA strand elongation	16/471	32/10867	3.83E-14	1.59E-11	1.45E-11	MCM8/PRIM2/MCM4/MCM2/MCM6/MCM3/PRIM1/RFC3/DNA2/RPA3/PCNA/FEN1/POLA2/RFC2/GINS2/RFC4	16
R-HSA-1650814	Collagen biosynthesis and modifying enzymes	19/471	67/10867	3.09E-11	8.54E-09	7.78E-09	COL22A1/COL18A1/COL10A1/COL11A1/COL5A1/COL6A1/COL3A1/COL1A1/COL1A2/P4HA1/PLOD2/P3H2/COLGALT1/PLOD3/PLOD1/P3H1/SERPINH1/COL16A1/COL7A1	19
R-HSA-180786	Extension of Telomeres	15/471	51/10867	2.17E-09	4.41E-07	4.02E-07	PRIM2/DSCC1/PRIM1/CDK2/RFC3/DNA2/RUVBL1/RPA3/PCNA/FEN1/POLA2/CHTF18/RFC2/RFC4/PIF1	15
R-HSA-69186	Lagging Strand Synthesis	10/471	20/10867	2.66E-09	4.41E-07	4.02E-07	PRIM2/PRIM1/RFC3/DNA2/RPA3/PCNA/FEN1/POLA2/RFC2/RFC4	10
R-HSA-2022090	Assembly of collagen fibrils and other multimeric structures	16/471	61/10867	4.03E-09	5.56E-07	5.07E-07	LOXL2/MMP13/LOXL3/COL18A1/COL10A1/COL11A1/COL5A1/COL6A1/COL3A1/COL1A1/COL1A2/MMP9/MMP3/LAMA3/LAMC2/COL7A1	16
R-HSA-174417	Telomere C-strand (Lagging Strand) Synthesis	12/471	34/10867	8.78E-09	1.04E-06	9.48E-07	PRIM2/DSCC1/PRIM1/RFC3/DNA2/RPA3/PCNA/FEN1/POLA2/CHTF18/RFC2/RFC4	12
R-HSA-176187	Activation of ATR in response to replication stress	12/471	37/10867	2.63E-08	2.73E-06	2.49E-06	MCM8/MCM4/MCM2/MCM6/MCM3/CDK2/RFC3/CLSPN/RPA3/ORC6/RFC2/RFC4	12
R-HSA-68962	Activation of the pre-replicative complex	11/471	33/10867	7.35E-08	6.77E-06	6.17E-06	MCM8/PRIM2/MCM4/MCM2/MCM6/MCM3/PRIM1/CDK2/RPA3/ORC6/POLA2	11
R-HSA-216083	Integrin cell surface interactions	17/471	85/10867	1.05E-07	8.72E-06	7.95E-06	IBSP/COL18A1/ITGA11/COL10A1/FN1/COL5A1/COL6A1/COL3A1/COL1A1/COL1A2/COL16A1/ITGA5/ITGAM/ITGAX/SPP1/ICAM5/COL7A1	17
R-HSA-1442490	Collagen degradation	14/471	64/10867	4.44E-07	3.35E-05	3.05E-05	MMP13/COL18A1/COL10A1/COL11A1/COL5A1/COL6A1/COL3A1/COL1A1/COL1A2/MMP11/MMP9/MMP3/COL16A1/COL7A1	14
R-HSA-69091	Polymerase switching	7/471	14/10867	7.24E-07	4.29E-05	3.91E-05	PRIM2/PRIM1/RFC3/PCNA/POLA2/RFC2/RFC4	7
R-HSA-69109	Leading Strand Synthesis	7/471	14/10867	7.24E-07	4.29E-05	3.91E-05	PRIM2/PRIM1/RFC3/PCNA/POLA2/RFC2/RFC4	7
R-HSA-69166	Removal of the Flap Intermediate	7/471	14/10867	7.24E-07	4.29E-05	3.91E-05	PRIM2/PRIM1/DNA2/RPA3/PCNA/FEN1/POLA2	7
R-HSA-174411	Polymerase switching on the C-strand of the telomere	9/471	26/10867	8.08E-07	4.47E-05	4.07E-05	PRIM2/DSCC1/PRIM1/RFC3/PCNA/POLA2/CHTF18/RFC2/RFC4	9
R-HSA-5693579	Homologous DNA Pairing and Strand Exchange	11/471	42/10867	1.14E-06	5.91E-05	5.39E-05	TOPBP1/RFC3/RAD51AP1/DNA2/XRCC2/BRCA1/RPA3/XRCC3/RMI2/RFC2/RFC4	11
R-HSA-69183	Processive synthesis on the lagging strand	7/471	15/10867	1.31E-06	6.37E-05	5.81E-05	PRIM2/PRIM1/DNA2/RPA3/PCNA/FEN1/POLA2	7
R-HSA-8948216	Collagen chain trimerization	11/471	44/10867	1.89E-06	8.70E-05	7.93E-05	COL22A1/COL18A1/COL10A1/COL11A1/COL5A1/COL6A1/COL3A1/COL1A1/COL1A2/COL16A1/COL7A1	11
R-HSA-8874081	MET activates PTK2 signaling	9/471	30/10867	3.17E-06	0.000138262	0.000126052	LAMC1/COL11A1/FN1/COL5A1/COL3A1/COL1A1/COL1A2/LAMA3/LAMC2	9
R-HSA-176974	Unwinding of DNA	6/471	12/10867	4.75E-06	0.00018938	0.000172655	MCM8/MCM4/MCM2/MCM6/MCM3/GINS2	6
R-HSA-5685942	HDR through Homologous Recombination (HRR)	13/471	67/10867	4.80E-06	0.00018938	0.000172655	TOPBP1/EME1/RFC3/RAD51AP1/DNA2/XRCC2/BRCA1/RPA3/XRCC3/PCNA/RMI2/RFC2/RFC4	13
R-HSA-5693616	Presynaptic phase of homologous DNA pairing and strand exchange	9/471	39/10867	3.31E-05	0.001248499	0.001138242	TOPBP1/RFC3/DNA2/XRCC2/BRCA1/RPA3/RMI2/RFC2/RFC4	9
R-HSA-110312	Translesion synthesis by REV1	6/471	16/10867	3.55E-05	0.001278505	0.001165598	RFC3/MAD2L2/RPA3/PCNA/RFC2/RFC4	6
R-HSA-3000171	Non-integrin membrane-ECM interactions	11/471	59/10867	3.83E-05	0.001321372	0.00120468	PRKCA/LAMC1/COL10A1/COL11A1/FN1/COL5A1/COL3A1/COL1A1/COL1A2/LAMA3/LAMC2	11
R-HSA-8875878	MET promotes cell motility	9/471	41/10867	5.07E-05	0.00162184	0.001478613	LAMC1/COL11A1/FN1/COL5A1/COL3A1/COL1A1/COL1A2/LAMA3/LAMC2	9
R-HSA-5655862	Translesion synthesis by POLK	6/471	17/10867	5.28E-05	0.00162184	0.001478613	RFC3/MAD2L2/RPA3/PCNA/RFC2/RFC4	6
R-HSA-5656121	Translesion synthesis by POLI	6/471	17/10867	5.28E-05	0.00162184	0.001478613	RFC3/MAD2L2/RPA3/PCNA/RFC2/RFC4	6
R-HSA-69002	DNA Replication Pre-Initiation	13/471	85/10867	6.85E-05	0.002029181	0.00184998	PSMB2/PSMB9/MCM8/PRIM2/MCM4/MCM2/MCM6/MCM3/PRIM1/CDK2/RPA3/ORC6/POLA2	13
R-HSA-110373	Resolution of AP sites via the multiple-nucleotide patch replacement pathway	7/471	26/10867	8.81E-05	0.002519023	0.002296563	PARP2/RFC3/RPA3/PCNA/FEN1/RFC2/RFC4	7
R-HSA-3000178	ECM proteoglycans	12/471	76/10867	9.46E-05	0.002614059	0.002383206	LAMC1/IBSP/ASPN/FN1/COL5A1/COL6A1/COL3A1/COL1A1/COL1A2/LAMA3/SERPINE1/ITGAX	12
R-HSA-3000480	Scavenging by Class A Receptors	6/471	19/10867	0.00010753	0.002875548	0.002621603	SCARA5/COL3A1/COL1A1/COL1A2/FTL/HSP90B1	6
R-HSA-5685938	HDR through Single Strand Annealing (SSA)	8/471	37/10867	0.000149135	0.003863528	0.003522332	TOPBP1/RFC3/DNA2/BRCA1/RPA3/RMI2/RFC2/RFC4	8
R-HSA-5651801	PCNA-Dependent Long Patch Base Excision Repair	6/471	21/10867	0.000199719	0.005017176	0.0045741	RFC3/RPA3/PCNA/FEN1/RFC2/RFC4	6
R-HSA-2214320	Anchoring fibril formation	5/471	15/10867	0.00031324	0.00763753	0.006963046	COL1A1/COL1A2/LAMA3/LAMC2/COL7A1	5
R-HSA-5693568	Resolution of D-loop Structures through Holliday Junction Intermediates	7/471	33/10867	0.000439847	0.010418084	0.009498044	EME1/RAD51AP1/DNA2/XRCC2/BRCA1/XRCC3/RMI2	7
R-HSA-5693537	Resolution of D-Loop Structures	7/471	34/10867	0.000533493	0.012285165	0.011200239	EME1/RAD51AP1/DNA2/XRCC2/BRCA1/XRCC3/RMI2	7
R-HSA-111367	SLBP independent Processing of Histone Pre-mRNAs	4/471	10/10867	0.000593873	0.013102865	0.011945726	SNRPF/SNRPG/SNRPB/NCBP2	4
R-HSA-4655427	SUMOylation of DNA methylation proteins	5/471	17/10867	0.000600614	0.013102865	0.011945726	DNMT3B/DNMT3A/CBX2/CBX8/DNMT1	5
R-HSA-5693554	Resolution of D-loop Structures through Synthesis-Dependent Strand Annealing (SDSA)	6/471	26/10867	0.00070462	0.014977683	0.013654976	RAD51AP1/DNA2/XRCC2/BRCA1/XRCC3/RMI2	6
R-HSA-3000170	Syndecan interactions	6/471	27/10867	0.000873207	0.018097216	0.016499017	PRKCA/FN1/COL5A1/COL3A1/COL1A1/COL1A2	6
R-HSA-77588	SLBP Dependent Processing of Replication-Dependent Histone Pre-mRNAs	4/471	11/10867	0.00090141	0.018226069	0.016616491	SNRPF/SNRPG/SNRPB/NCBP2	4
R-HSA-5693607	Processing of DNA double-strand break ends	12/471	98/10867	0.001046418	0.020250152	0.018461824	TOPBP1/CDK2/TIMELESS/RFC3/DNA2/CLSPN/BRCA1/MDC1/RPA3/RMI2/RFC2/RFC4	12
R-HSA-110320	Translesion Synthesis by POLH	5/471	19/10867	0.00105037	0.020250152	0.018461824	RFC3/RPA3/PCNA/RFC2/RFC4	5
R-HSA-73933	Resolution of Abasic Sites (AP sites)	7/471	39/10867	0.001265001	0.023833775	0.02172897	PARP2/RFC3/RPA3/PCNA/FEN1/RFC2/RFC4	7
R-HSA-73817	Purine ribonucleoside monophosphate biosynthesis	4/471	12/10867	0.001306083	0.024060948	0.021936082	IMPDH1/PAICS/PPAT/GMPS	4
R-HSA-3000157	Laminin interactions	6/471	30/10867	0.001568811	0.0282727	0.025775885	LAMC1/COL18A1/NID2/LAMA3/LAMC2/COL7A1	6
R-HSA-69052	Switching of origins to a post-replicative state	11/471	91/10867	0.001859608	0.031558423	0.02877144	PSMB2/PSMB9/MCM8/MCM4/MCM2/MCM6/MCM3/CDK2/CCNE1/UBE2S/ORC6	11
R-HSA-191859	snRNP Assembly	8/471	53/10867	0.001865335	0.031558423	0.02877144	NUP107/NUP155/GEMIN6/SNRPD1/SNRPF/SNRPG/SNRPB/NCBP2	8
R-HSA-194441	Metabolism of non-coding RNA	8/471	53/10867	0.001865335	0.031558423	0.02877144	NUP107/NUP155/GEMIN6/SNRPD1/SNRPF/SNRPG/SNRPB/NCBP2	8
R-HSA-113510	E2F mediated regulation of DNA replication	5/471	22/10867	0.00213636	0.035420848	0.032292767	MCM8/PRIM2/PRIM1/ORC6/POLA2	5
R-HSA-1592389	Activation of Matrix Metalloproteinases	6/471	33/10867	0.002621711	0.042615656	0.038852189	SPOCK3/MMP13/COL18A1/MMP11/MMP9/MMP3	6
R-HSA-9675135	Diseases of DNA repair	6/471	34/10867	0.003069186	0.046412531	0.042313755	MSH2/RAD51AP1/DNA2/XRCC2/BRCA1/RMI2	6
R-HSA-9675136	Diseases of DNA Double-Strand Break Repair	5/471	24/10867	0.003210387	0.046412531	0.042313755	RAD51AP1/DNA2/XRCC2/BRCA1/RMI2	5
R-HSA-9701193	Defective HDR through Homologous Recombination (HRR) due to PALB2 loss of function	5/471	24/10867	0.003210387	0.046412531	0.042313755	RAD51AP1/DNA2/XRCC2/BRCA1/RMI2	5
R-HSA-9704331	Defective HDR through Homologous Recombination Repair (HRR) due to PALB2 loss of BRCA1 binding function	5/471	24/10867	0.003210387	0.046412531	0.042313755	RAD51AP1/DNA2/XRCC2/BRCA1/RMI2	5
R-HSA-9704646	Defective HDR through Homologous Recombination Repair (HRR) due to PALB2 loss of BRCA2/RAD51/RAD51C binding function	5/471	24/10867	0.003210387	0.046412531	0.042313755	RAD51AP1/DNA2/XRCC2/BRCA1/RMI2	5
R-HSA-8866910	TFAP2 (AP-2) family regulates transcription of growth factors and their receptors	4/471	15/10867	0.003247198	0.046412531	0.042313755	CGB5/CGB8/VEGFA/ATAD2	4
R-HSA-8956320	Nucleobase biosynthesis	4/471	15/10867	0.003247198	0.046412531	0.042313755	IMPDH1/PAICS/PPAT/GMPS	4
R-HSA-68949	Orc1 removal from chromatin	9/471	71/10867	0.003412969	0.047955108	0.043720104	PSMB2/PSMB9/MCM8/MCM4/MCM2/MCM6/MCM3/CDK2/ORC6	9
